# Supplementary material
Source: PubMed Central journal article supplement (PMC9074114)
Supplement: NIHMS1749863-supplement-1.pdf [file NIHMS1749863-supplement-1.pdf]

## SUPPLEMENTAL MATERIAL

**Supplemental Table 1. Unadjusted annual incidence of heart failure with preserved, reduced, midrange or unknown left ventricular ejection fraction, overall and by HIV status.**

| Heart Failure Subtype*      | Crude rate per 100 person-years<br>(95% confidence limits) |                  |                     |
|-----------------------------|------------------------------------------------------------|------------------|---------------------|
|                             | Overall Cohort                                             | Persons with HIV | Persons without HIV |
|                             | N=425,454                                                  | N=38,868         | N=386,586           |
| HFpEF (N=1,013 events)      | 0.04 (0.04-0.04)                                           | 0.06 (0.05-0.07) | 0.04 (0.04-0.04)    |
| HFrEF (N=959 events)        | 0.04 (0.04-0.04)                                           | 0.05 (0.04-0.06) | 0.04 (0.04-0.04)    |
| HFmrEF (N=346 events)       | 0.01 (0.01-0.02)                                           | 0.02 (0.02-0.03) | 0.01 (0.01-0.01)    |
| Unknown EF (N=1,559 events) | 0.06 (0.06-0.07)                                           | 0.10 (0.09-0.12) | 0.06 (0.06-0.06)    |

\*HFpEF denotes heart failure with preserved ejection fraction; HFrEF denotes heart failure with reduced ejection fraction; and HFmrEF denotes heart failure with midrange ejection fraction.

**Supplemental Table 2. Unadjusted annual incidence of heart failure with preserved, reduced, midrange or unknown left ventricular ejection fraction, stratified by age.**

| Heart Failure Subtype*    | Crude rate per 100 person-years<br>(95% confidence limits) |                              |                                  |
|---------------------------|------------------------------------------------------------|------------------------------|----------------------------------|
|                           |                                                            | Age 21 to 40 years           |                                  |
|                           | Overall Cohort<br>N=212,511                                | Persons with HIV<br>N=19,384 | Persons without HIV<br>N=193,127 |
| All HF (N=486 events)     | 0.05 (0.04-0.05)                                           | 0.10 (0.08-0.12)             | 0.04 (0.04-0.04)                 |
| HFpEF (N=126 events)      | 0.01 (0.01-0.01)                                           | 0.02 (0.01-0.03)             | 0.01 (0.01-0.01)                 |
| HFrfEF (N=140 events)     | 0.01 (0.01-0.02)                                           | 0.03 (0.02-0.04)             | 0.01 (0.01-0.01)                 |
| HFmrEF (N=39 events)      | 0.00 (0.00-0.00)                                           | 0.01 (0.01-0.02)             | 0.00 (0.00-0.00)                 |
| Unknown EF (N=181 events) | 0.02 (0.01-0.02)                                           | 0.04 (0.03-0.05)             | 0.01 (0.01-0.02)                 |
|                           |                                                            | Age 41 to 50 years           |                                  |
|                           | Overall Cohort<br>N=133,169                                | Persons with HIV<br>N=12,189 | Persons without HIV<br>N=120,980 |
| All HF (N=1,256 events)   | 0.14 (0.14-0.15)                                           | 0.19 (0.16-0.23)             | 0.14 (0.13-0.15)                 |
| HFpEF (N=298 events)      | 0.03 (0.03-0.04)                                           | 0.05 (0.03-0.06)             | 0.03 (0.03-0.04)                 |
| HFrfEF (N=352 events)     | 0.04 (0.04-0.04)                                           | 0.04 (0.03-0.06)             | 0.04 (0.04-0.04)                 |
| HFmrEF (N=101 events)     | 0.01 (0.01-0.01)                                           | 0.02 (0.01-0.03)             | 0.01 (0.01-0.01)                 |
| Unknown EF (N=505 events) | 0.06 (0.05-0.06)                                           | 0.08 (0.06-0.11)             | 0.06 (0.05-0.06)                 |
|                           |                                                            | Age ≥51 years                |                                  |
|                           | Overall Cohort<br>N=79,774                                 | Persons with HIV<br>N=7,295  | Persons without HIV<br>N=72,479  |
| All HF (N=2,135 events)   | 0.43 (0.41-0.45)                                           | 0.59 (0.52-0.67)             | 0.42 (0.40-0.44)                 |
| HFpEF (N=589 events)      | 0.12 (0.11-0.13)                                           | 0.15 (0.11-0.19)             | 0.11 (0.10-0.12)                 |
| HFrfEF (N=467 events)     | 0.09 (0.08-0.10)                                           | 0.11 (0.08-0.15)             | 0.09 (0.08-0.10)                 |
| HFmrEF (N=206 events)     | 0.04 (0.04-0.05)                                           | 0.05 (0.04-0.08)             | 0.04 (0.03-0.05)                 |
| Unknown EF (N=873 events) | 0.17 (0.16-0.19)                                           | 0.26 (0.22-0.32)             | 0.17 (0.15-0.18)                 |

\*HFpEF denotes heart failure with preserved ejection fraction; HFrfEF denotes heart failure with reduced ejection fraction; and HFmrEF denotes heart failure with midrange ejection fraction.

**Supplemental Table 3. Unadjusted annual incidence of heart failure with preserved, reduced, midrange or unknown left ventricular ejection fraction, stratified by sex.**

| Heart Failure Subtype*      | Crude rate per 100 person-years<br>(95% confidence limits) |                              |                                  |
|-----------------------------|------------------------------------------------------------|------------------------------|----------------------------------|
|                             |                                                            | Men                          |                                  |
|                             | Overall Cohort<br>N=373,260                                | Persons with HIV<br>N=34,125 | Persons without HIV<br>N=339,135 |
| All HF (N=3,496 events)     | 0.16 (0.16-0.17)                                           | 0.23 (0.20-0.25)             | 0.16 (0.15-0.16)                 |
| HFpEF (N=892 events)        | 0.04 (0.04-0.04)                                           | 0.06 (0.05-0.07)             | 0.04 (0.04-0.04)                 |
| HFrfEF (N=897 events)       | 0.04 (0.04-0.04)                                           | 0.05 (0.04-0.06)             | 0.04 (0.04-0.04)                 |
| HFmrEF (N=324 events)       | 0.02 (0.01-0.02)                                           | 0.02 (0.02-0.03)             | 0.01 (0.01-0.02)                 |
| Unknown EF (N=1,383 events) | 0.06 (0.06-0.07)                                           | 0.09 (0.08-0.11)             | 0.06 (0.06-0.07)                 |
|                             |                                                            | Women                        |                                  |
|                             | Overall Cohort<br>N=52,194                                 | Persons with HIV<br>N=4,743  | Persons without HIV<br>N=47,451  |
| All HF (N=381 events)       | 0.13 (0.12-0.14)                                           | 0.27 (0.21-0.35)             | 0.12 (0.10-0.13)                 |
| HFpEF (N=121 events)        | 0.04 (0.03-0.05)                                           | 0.05 (0.03-0.09)             | 0.04 (0.03-0.05)                 |
| HFrfEF (N=62 events)        | 0.02 (0.02-0.03)                                           | 0.05 (0.03-0.09)             | 0.02 (0.01-0.02)                 |
| HFmrEF (N=22 events)        | 0.01 (0.00-0.01)                                           | 0.02 (0.01-0.04)             | 0.01 (0.00-0.01)                 |
| Unknown EF (N=176 events)   | 0.06 (0.05-0.07)                                           | 0.15 (0.11-0.20)             | 0.05 (0.04-0.06)                 |

\*HFpEF denotes heart failure with preserved ejection fraction; HFrfEF denotes heart failure with reduced ejection fraction; and HFmrEF denotes heart failure with midrange ejection fraction.

**Supplemental Table 4. Unadjusted annual incidence of heart failure with preserved, reduced, midrange or unknown left ventricular ejection fraction, stratified by race/ethnicity.**

| Heart Failure Subtype*    | Crude rate per 100 person-years<br>(95% confidence limits) |                                       |                                  |
|---------------------------|------------------------------------------------------------|---------------------------------------|----------------------------------|
|                           | Overall Cohort<br>N=161,351                                | White<br>Persons with HIV<br>N=14,796 | Persons without HIV<br>N=146,555 |
| All HF (N=1,824 events)   | 0.16 (0.16-0.17)                                           | 0.25 (0.21-0.28)                      | 0.16 (0.15-0.17)                 |
| HFpEF (N=504 events)      | 0.05 (0.04-0.05)                                           | 0.06 (0.05-0.08)                      | 0.04 (0.04-0.05)                 |
| HFrfEF (N=472 events)     | 0.04 (0.04-0.05)                                           | 0.05 (0.04-0.07)                      | 0.04 (0.04-0.05)                 |
| HFmrEF (N=179 events)     | 0.02 (0.01-0.02)                                           | 0.03 (0.02-0.05)                      | 0.01 (0.01-0.02)                 |
| Unknown EF (N=669 events) | 0.06 (0.06-0.06)                                           | 0.10 (0.08-0.12)                      | 0.06 (0.05-0.06)                 |
|                           |                                                            | Black                                 |                                  |
|                           | Overall Cohort<br>N=89,680                                 | Persons with HIV<br>N=8,161           | Persons without HIV<br>N=81,519  |
| All HF (N=1,233 events)   | 0.23 (0.22-0.25)                                           | 0.31 (0.26-0.37)                      | 0.23 (0.21-0.24)                 |
| HFpEF (N=311 events)      | 0.06 (0.05-0.07)                                           | 0.09 (0.06-0.12)                      | 0.06 (0.05-0.06)                 |
| HFrfEF (N=313 events)     | 0.06 (0.05-0.07)                                           | 0.07 (0.05-0.10)                      | 0.06 (0.05-0.06)                 |
| HFmrEF (N=91 events)      | 0.02 (0.01-0.02)                                           | 0.03 (0.02-0.05)                      | 0.02 (0.01-0.02)                 |
| Unknown EF (N=516 events) | 0.10 (0.09-0.11)                                           | 0.12 (0.09-0.16)                      | 0.09 (0.09-0.10)                 |
|                           |                                                            | Asian/Pacific Islander                |                                  |
|                           | Overall Cohort<br>N=16,489                                 | Persons with HIV<br>N=1,506           | Persons without HIV<br>N=14,983  |
| All HF (N=84 events)      | 0.09 (0.07-0.11)                                           | 0.17 (0.10-0.29)                      | 0.08 (0.06-0.10)                 |
| HFpEF (N=28 events)       | 0.03 (0.02-0.04)                                           | 0.03 (0.01-0.10)                      | 0.03 (0.02-0.04)                 |
| HFrfEF (N=26 events)      | 0.03 (0.02-0.04)                                           | 0.04 (0.01-0.12)                      | 0.03 (0.02-0.04)                 |
| HFmrEF (N=11 events)      | 0.01 (0.01-0.02)                                           | 0.01 (0.00-0.09)                      | 0.01 (0.01-0.02)                 |
| Unknown EF (N=19 events)  | 0.02 (0.01-0.03)                                           | 0.09 (0.04-0.19)                      | 0.01 (0.01-0.02)                 |
|                           |                                                            | Hispanic                              |                                  |
|                           | Overall Cohort<br>N=87,032                                 | Persons with HIV<br>N=7,928           | Persons without HIV<br>N=79,104  |
| All HF (N=506 events)     | 0.11 (0.10-0.11)                                           | 0.12 (0.09-0.16)                      | 0.10 (0.09-0.11)                 |
| HFpEF (N=149 events)      | 0.03 (0.03-0.04)                                           | 0.04 (0.02-0.06)                      | 0.03 (0.03-0.04)                 |
| HFrfEF (N=128 events)     | 0.03 (0.02-0.03)                                           | 0.04 (0.02-0.06)                      | 0.03 (0.02-0.03)                 |
| HFmrEF (N=54 events)      | 0.01 (0.01-0.01)                                           | 0.01 (0.00-0.02)                      | 0.01 (0.01-0.02)                 |
| Unknown EF (N=175 events) | 0.04 (0.03-0.04)                                           | 0.04 (0.02-0.06)                      | 0.04 (0.03-0.04)                 |

\*HFpEF denotes heart failure with preserved ejection fraction; HFrfEF denotes heart failure with reduced ejection fraction; and HFmrEF denotes heart failure with midrange ejection fraction.
